# Supplementary material for: The RAB25 small GTPase determines aggressiveness of ovarian and breast cancers
Source: Springer Nature journal article supplement (doi:10.1038/nm1125), 2004-10-24
Supplement: nm1125-S3.pdf [file nm1125-S3.pdf]

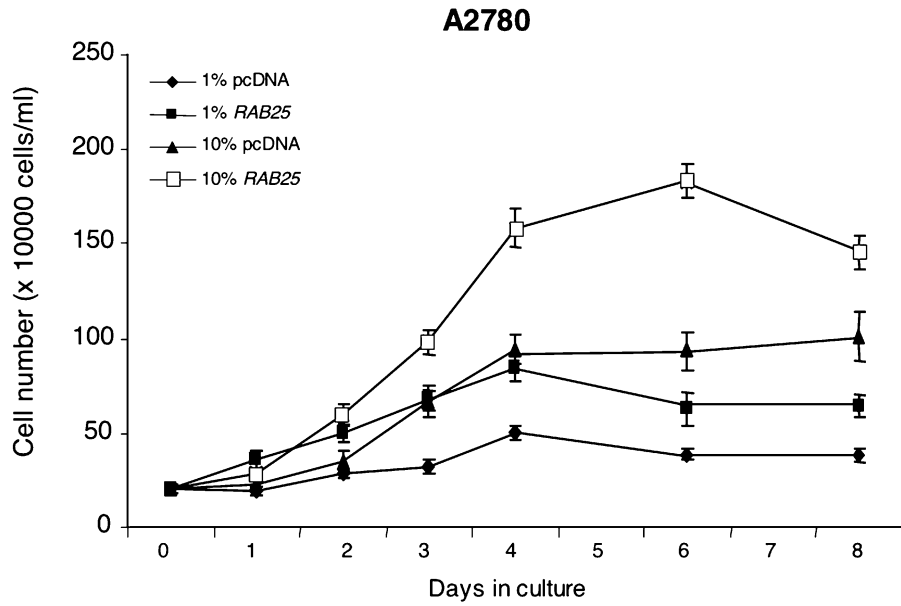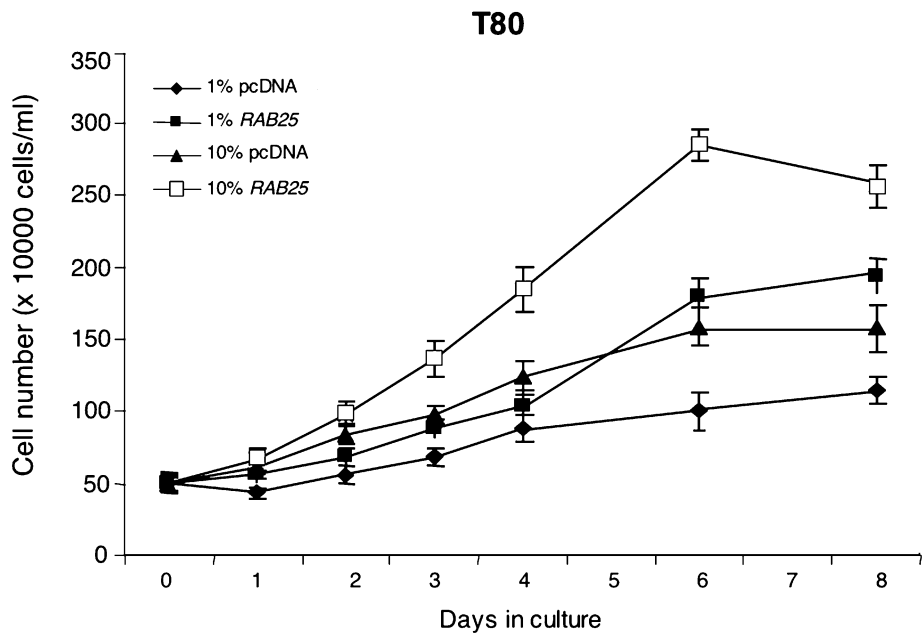

**Supplementary figure 3.** Effect of *RAB25* stable expression on cell proliferation in 1% or 10% fetal bovine serum containing media.  $2 \times 10^5$  and  $5 \times 10^5$  of A2780 (**a**) and T80 (**b**) cells were plated at day 0, respectively. Total cells were harvested and counted at the indicated day. pcDNA transfected cells were used as control. Results are the mean $\pm$ SD of 3 replicates representative of three individual experiments.
